# Supplementary material for: Reactivity and mechanism investigation of selective hydrogenation of 2,3,5-trimethylbenzoquinone on in situ generated metallic cobalt
Source: Royal Society of Chemistry journal article supplement (doi:10.1039/c5cy02171e), 2016-01-01
Supplement: c5cy02171e1.pdf [file c5cy02171e1.pdf]

## Electronic Supplementary Information

Reactivity and Mechanism Investigation for Selective Hydrogenation of  
2,3,5-Trimethylbenzoquinone on *in-situ* Generated Metallic Cobalt

*Diefeng Su*,<sup>a,†</sup> *Zhongzhe Wei*,<sup>a,†</sup> *Shanjun Mao*,<sup>a</sup> *Jing Wang*,<sup>a</sup> *Yi Li*,

<sup>a</sup> *Haoran Li*,<sup>a</sup> *Zhirong Chen*,<sup>a</sup> *Yong Wang*<sup>\*a</sup>

<sup>a</sup>Advanced Materials and Catalysis Group, ZJU-NHU United R&D  
Center, Department of Chemistry, Zhejiang University,

Hangzhou 310028, P. R. China

\* Corresponding author. Fax: +86-0571-87951895.

E-mail Address: [chemwy@zju.edu.cn](mailto:chemwy@zju.edu.cn)

<sup>†</sup>These authors contributed equally to this work.

### Content

1. Catalysts Preparation Method (Page 2)
2. Figure S1-S8 (Page 2-6)
3. Table S1-S7 (Page 6-11)
4. GC-MS results (Page 12-15)

### Catalysts Preparation Method.

The  $\text{CoO}_x@\text{CN}$  catalyst was prepared by thermal condensation of GAH, melamine, and  $\text{Co}(\text{CH}_3\text{COO})_2 \cdot 4\text{H}_2\text{O}$ . In typical, a mixture of 1g GAH, 40 g melamine and 0.814 g cobalt acetate were dissolved in diluted water and stirred under 80 °C. Then the dried solid were grinded into powder and directly calcined under a  $\text{N}_2$  flow of 400  $\text{mL min}^{-1}$ . The temperature was increased to 900 °C and held for 1h after the furnace was firstly heated to 600 °C and kept for 1h. Afterwards, the sample was cooled down to room temperature. Finally, the product was ground in the crucible and  $\text{CoO}_x@\text{CN}$  was obtained. The  $\text{CoO}_x@\text{CN-800}$ , and  $\text{CoO}_x@\text{CN-1000}$  were prepared under the method except that the pyrolysis temperature was 800 °C and 1000 °C, respectively. In similar,  $\text{CoO}_x@\text{M}$ ,  $\text{CoO}_x@\text{G}$  and CN were made from mixtures of cobalt acetate & melamine, cobalt acetate & GAH and melamine & GAH at 900 °C. The way to fabricate  $\text{CoO}_x@\text{GL}$  catalyst was the same as  $\text{CoO}_x@\text{CN}$ , except that glucose was used as carbon source. The sample of  $\text{CoO}_x@\text{NCNTs}$  and  $\text{CoO}_x@\text{CN-S}$  were synthesized by applying cobalt nitrate and cobalt sulfate as cobalt source via the same pyrolysis process as  $\text{CoO}_x@\text{CN}$ . The preparation way of  $\text{CoO}_x@\text{NCNTs}$  was in line with paper.<sup>1</sup> The AT- $\text{CoO}_x@\text{CN}$  catalysts were acquired by acid treatment of  $\text{CoO}_x@\text{CN}$  with 2 M HCl solution for 3 days at 50 °C.  $\text{Co}_3\text{O}_4/\text{SiO}_2$ ,  $\text{Co}_3\text{O}_4/\text{ZrO}_2$  and  $\text{Co}_3\text{O}_4/\text{TiO}_2$  were all obtained by impregnation method. In typical, 1g  $\text{SiO}_2$  and 1.56g cobalt nitrate were dissolved in 15 mL deionized water. Then the mixture was heated at 80 °C with stirring to remove water. After the dried solid was grounded finely, it was roasted in the muffle at 450 °C for 2h. Finally, the corresponding supported cobalt oxide (named as  $\text{Co}_3\text{O}_4/\text{SiO}_2$ ) was obtained.

**Figure S1.** TEM images of  $\text{CoO}_x@\text{M}$  (a) and  $\text{CoO}_x@\text{G}$  (b); BET (c) and Nitrogen content (d) analysis of  $\text{CoO}_x@\text{M}$ ,  $\text{CoO}_x@\text{G}$  and  $\text{CoO}_x@\text{CN}$ .

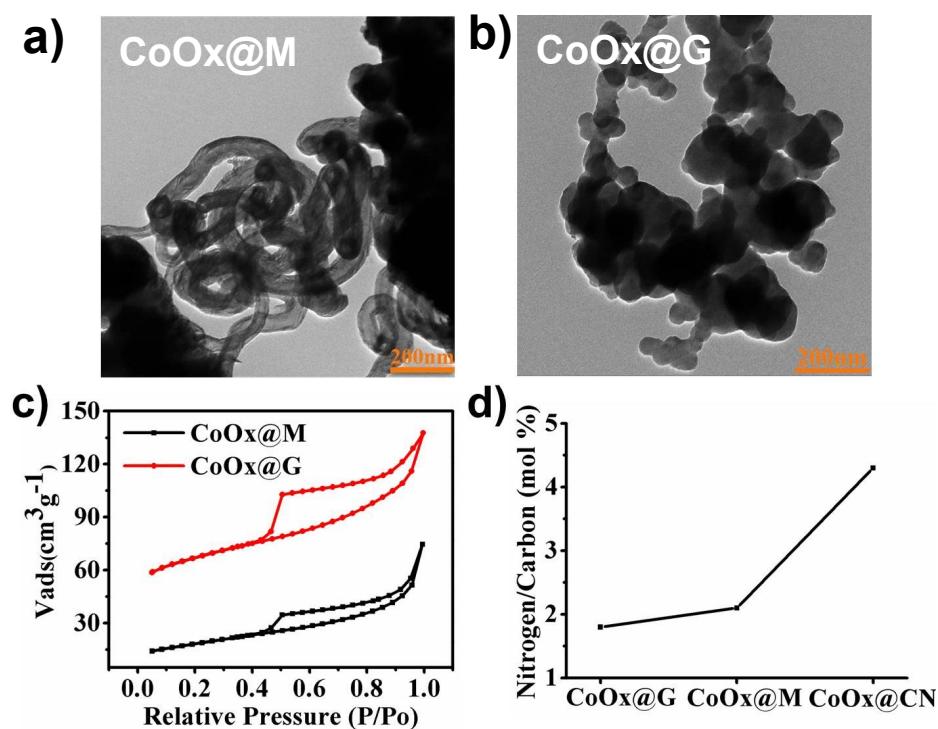

**Figure S2.** TEM images of CoO<sub>x</sub>@NCNTs (a) and CoO<sub>x</sub>@CN-S (b); XRD pattern (c) of CoO<sub>x</sub>@NCNTs and CoO<sub>x</sub>@CN-S; Catalytic performance under the same reaction condition (6.7 mmol TMBQ, 1.6 mol% Co to substrate, 15mL i-propanol, 120 °C, 2 MPa H<sub>2</sub>, 6 h).

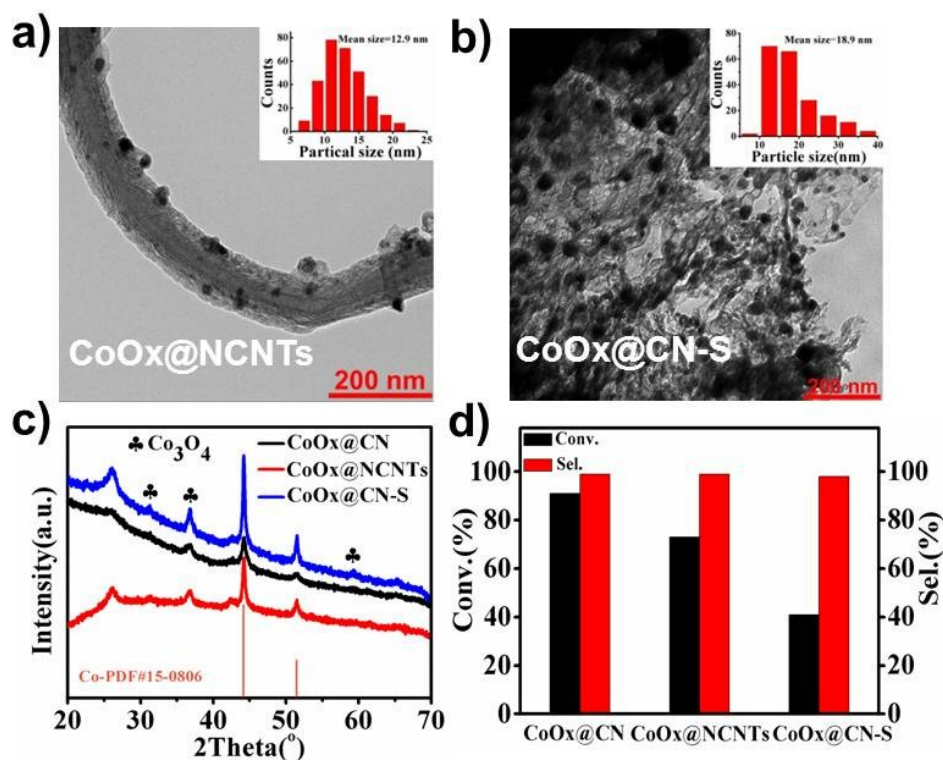

**Note:** The average size of CoO<sub>x</sub>@NCNTs and CoO<sub>x</sub>@CN-S is 12.9 nm and 18.9 nm, respectively.

**Figure S3.** TEM images of the catalysts pyrolyzed at 800 °C (a) and 1000 °C (b); (c) and (d) are BET and XRD patterns.

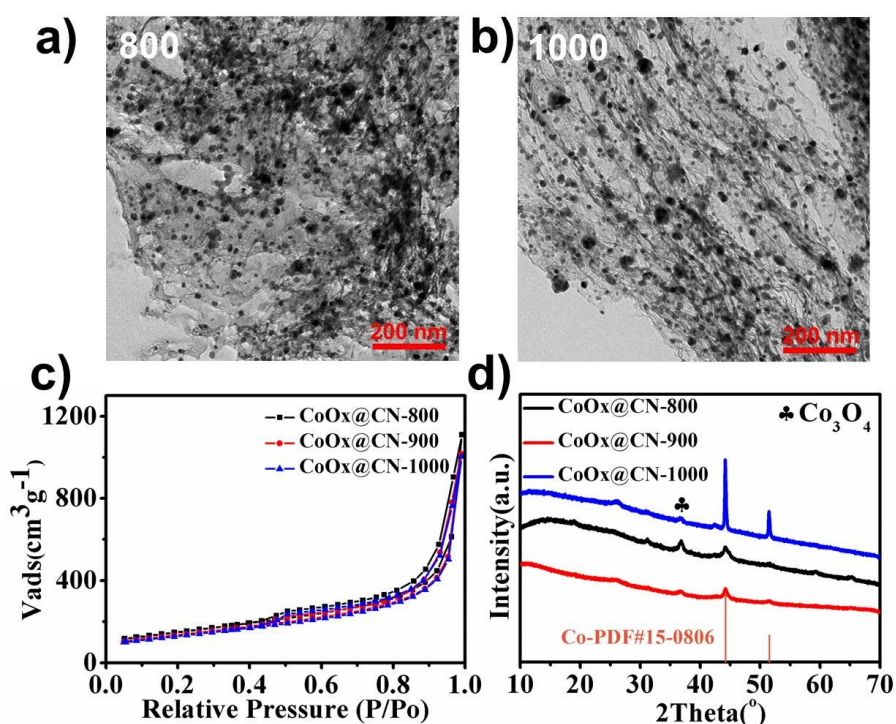

**Figure S4.** TEM characterization (a), XRD plots (b), BET analysis (c) and Nitrogen content (d) of CoOx@GL.

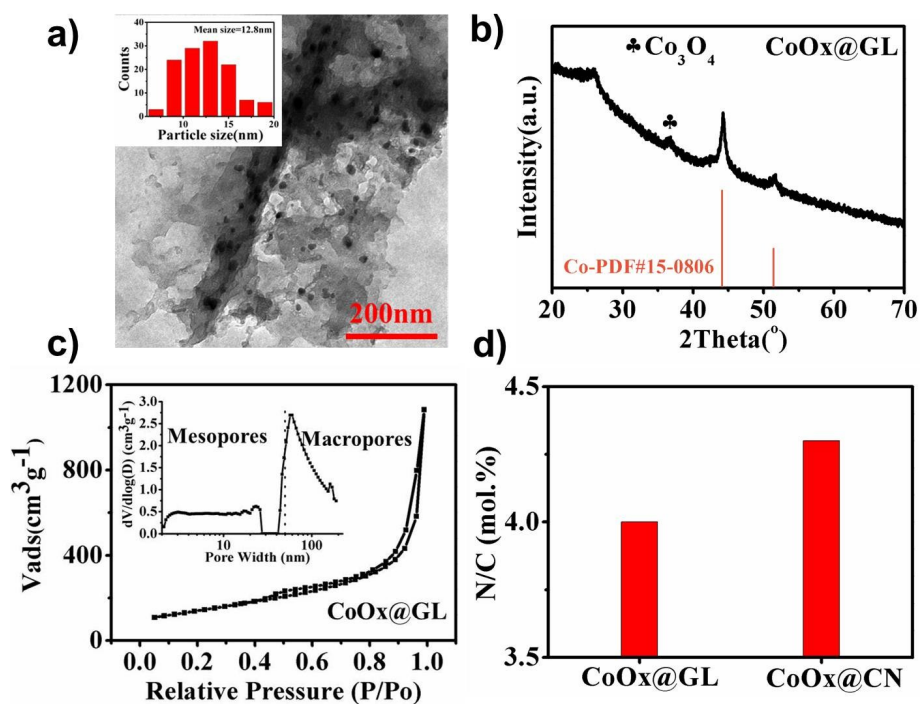

**Figure S5.** XRD patterns (a) of the three supported cobalt oxide catalysts before and after reaction; TEM pictures (b) of the three supported cobalt oxide catalysts.

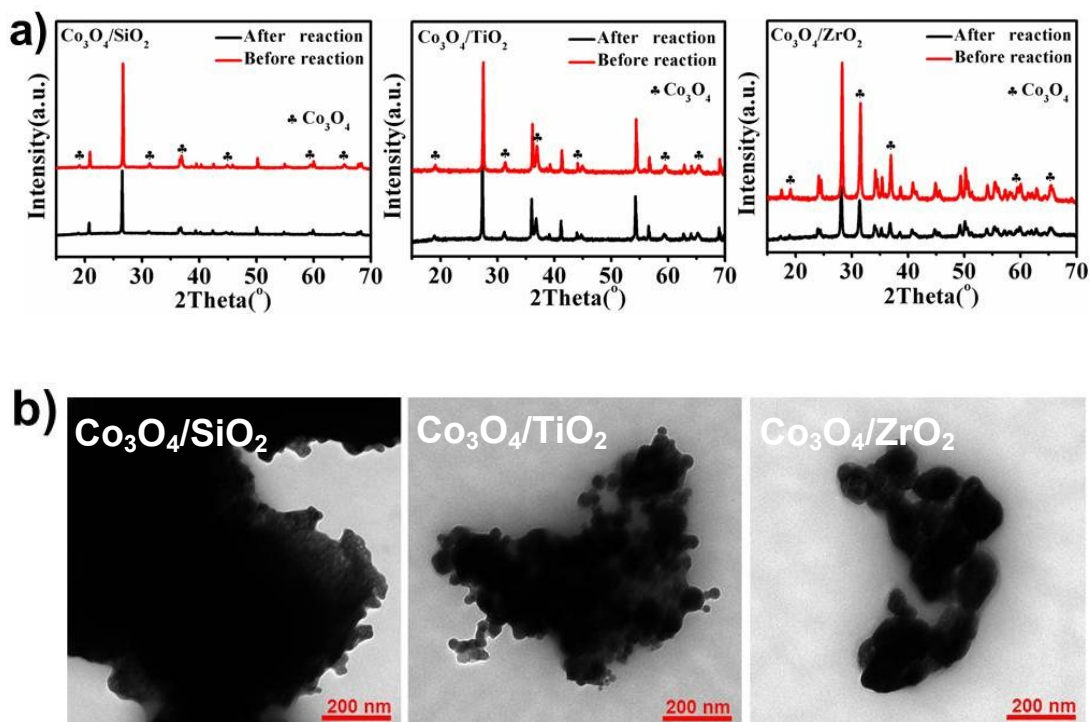

**Figure S6.** (a) XRD and (b) HRTEM image of AT-CoO<sub>x</sub>@CN

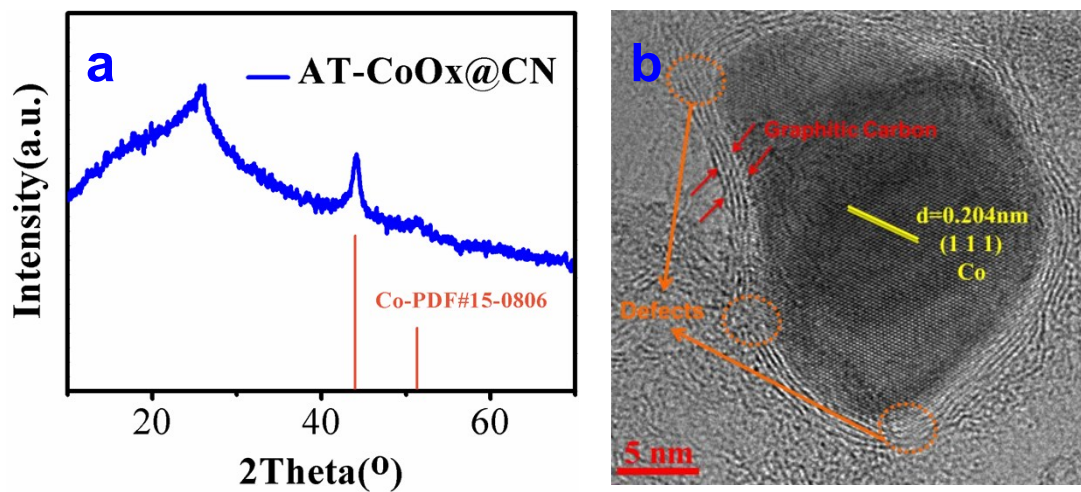

**Figure S7.** The energy changes as TMBQ closing to Co (1 1 1) surface gradually.

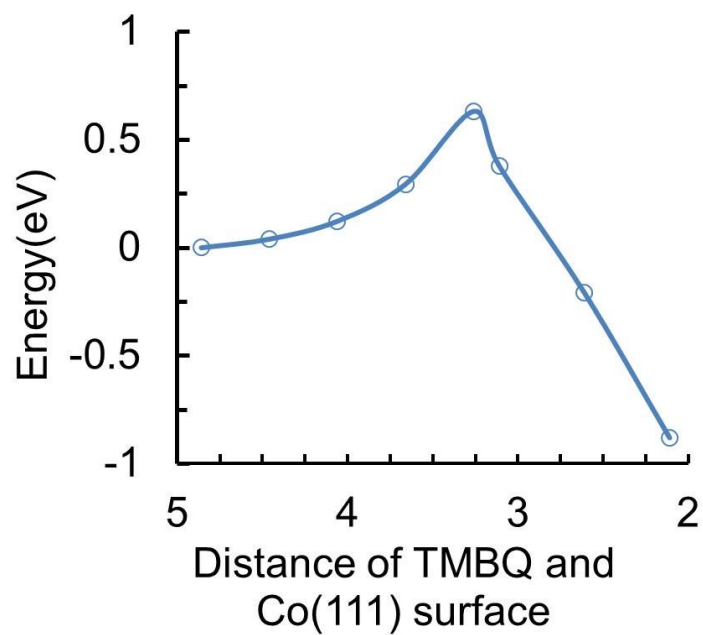

**Figure S8.** Configurations during the first-step hydrogenation of TMBQ.

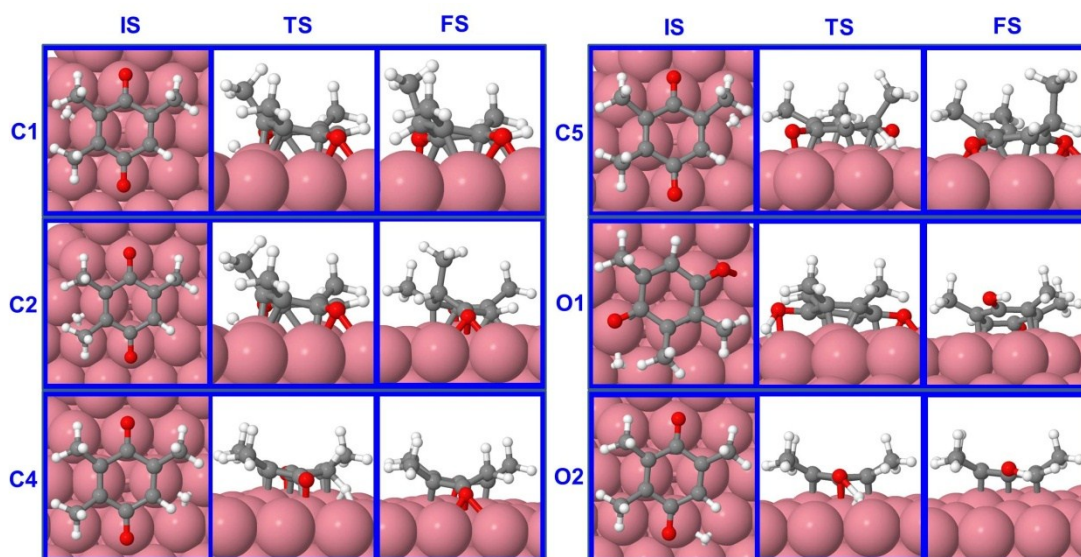

**Note:** IS, TS and FS mean Initial State, Transition State and Final State.

**Table S1.** K-point tests.

| K-point               | $E_{\text{ads}}/\text{eV}$ | $\Delta E_{\text{C2}}/\text{eV}$ |
|-----------------------|----------------------------|----------------------------------|
| $1 \times 1 \times 1$ | -0.88                      | 0.16                             |
| $2 \times 2 \times 1$ | -0.67                      | -                                |
| $3 \times 3 \times 1$ | -0.51                      | -0.19                            |

$E_{\text{ads}}$  means the adsorption energy of the most stable configuration for TMBQ on Co (111) surface.  $\Delta E_{\text{C2}}$  means the enthalpy change for the first hydrogenation on C2 atom. The energy changes of  $E_{\text{ads}}$  and  $\Delta E_{\text{C2}}$  under  $1 \times 1 \times 1$  and  $3 \times 3 \times 1$  k-point meshes are 0.37 and 0.34 eV respectively, with the random error of about 0.03 eV. These results indicate that  $1 \times 1 \times 1$  k-point mesh is barely tolerable.

**Table S2.** BET analysis.

|                           | Specific surface area<br>(m <sup>2</sup> g <sup>-1</sup> ) | Total pore volume<br>(cm <sup>3</sup> g <sup>-1</sup> ) | Pore Size<br>(nm) |
|---------------------------|------------------------------------------------------------|---------------------------------------------------------|-------------------|
| CoO <sub>x</sub> @M       | 65                                                         | 0.12                                                    | 6.5               |
| CoO <sub>x</sub> @G       | 217                                                        | 0.21                                                    | 4.8               |
| CoO <sub>x</sub> @CN      | 484                                                        | 1.57                                                    | 11.8              |
| CoO <sub>x</sub> @NCNTs   | 254                                                        | 0.67                                                    | 9.6               |
| CoO <sub>x</sub> @CN-S    | 272                                                        | 0.68                                                    | 8.0               |
| CoO <sub>x</sub> @CN-800  | 531                                                        | 1.72                                                    | 11.7              |
| CoO <sub>x</sub> @CN-1000 | 464                                                        | 1.55                                                    | 11.3              |
| CoO <sub>x</sub> @GL      | 500                                                        | 1.68                                                    | 12.1              |

**Note:**

- 1) CoO<sub>x</sub>@M and CoO<sub>x</sub>@G were made from mixtures of cobalt acetate & melamine and cobalt acetate & GAH, respectively.
- 2) The cobalt resource of CoO<sub>x</sub>@NCNTs and CoO<sub>x</sub>@CN-S were cobalt nitrate and cobalt sulfate.
- 3) CoO<sub>x</sub>@CN-800 and CoO<sub>x</sub>@CN-1000 prepared at 800 °C and 1000 °C, respectively.
- 4) CoO<sub>x</sub>@GL was synthesized by using glucose as carbon source.

**Table S3.** ICP results.

| Sample                                           | Co (wt %) |
|--------------------------------------------------|-----------|
| CoO <sub>x</sub> @CN-800                         | 33.6      |
| CoO <sub>x</sub> @CN-900                         | 31.6      |
| CoO <sub>x</sub> @CN-1000                        | 32        |
| AT-CoO <sub>x</sub> @CN                          | 10.8      |
| CoO <sub>x</sub> @G                              | 44.3      |
| CoO <sub>x</sub> @M                              | 43        |
| CoO <sub>x</sub> @GL                             | 29.3      |
| Co <sub>3</sub> O <sub>4</sub> /SiO <sub>2</sub> | 23.1      |
| Co <sub>3</sub> O <sub>4</sub> /ZrO <sub>2</sub> | 22.7      |
| Co <sub>3</sub> O <sub>4</sub> /TiO <sub>2</sub> | 23.3      |

**Table S4.** Hydrogenation of various  $\alpha,\beta$ -unsaturated carbonyls over  $\text{CoO}_x@\text{CN}^{\text{a}}$ 

| Entry          | Substrate                                                                           | Product                                                                             | Time (h) | Conv.(%) | Yield (%) |
|----------------|-------------------------------------------------------------------------------------|-------------------------------------------------------------------------------------|----------|----------|-----------|
| 1              | 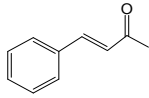   |    | 3.5      | 99       | 99        |
| 2              |    |    | 2.5      | 99       | 99        |
| 3              |    |    | 1.5      | 99       | 99        |
| 4              |    |    | 1.5      | 99       | 99        |
| 5              |    |    | 2.5      | 99       | 99        |
| 6              |   |   | 1        | 99       | 99        |
| 7 <sup>b</sup> |  |  | 2        | 97       | 94        |

<sup>a</sup>Reaction conditions: 0.5 mmol reactant, 16 mol% Co to substrate, 15 mL ethanol, 100 °C, 2 MPa  $\text{H}_2$ ; <sup>b</sup>Reaction conditions: 0.5 mmol reactant, 16 mol% Co to substrate, 15 mL ethanol, 80 °C, 2 MPa  $\text{H}_2$ . All the results were determined by GC and GC-MS.



**Table S5.** The optimized stable configurations with the corresponding adsorption energies.

| Stable Configurations                                                               | Energy (eV) |
|-------------------------------------------------------------------------------------|-------------|
| 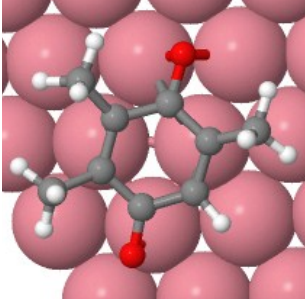   | -0.76       |
|   | -0.88       |
|  | -0.87       |

**Table S6.** Energy of the first hydrogen adatom added to TMBQ.

| Position | $E_{\text{initial}}$ (eV) | $E_{\text{final}}$ (eV) | $E_a$ (eV) |
|----------|---------------------------|-------------------------|------------|
| C1       | 0.31                      | 0.70                    | 0.73       |
| C2       | 0.32                      | 0.47                    | 0.77       |
| C4       | 0.37                      | 0.76                    | 0.81       |
| C5       | 0.38                      | 0.49                    | 0.69       |
| O1       | 0.30                      | 0.57                    | 0.86       |
| O2       | 0.37                      | 0.56                    | 0.69       |

**Table S7.** Energy of two hydrogen adatom added to TMBQ.

| First Hydrogenated atom | Second Hydrogenated atom | Energy (eV) | Configurations                                                                       |
|-------------------------|--------------------------|-------------|--------------------------------------------------------------------------------------|
| C2                      | C1                       | 0.76        | 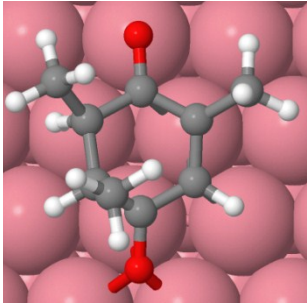   |
|                         | O1                       | 0.90        |   |
| O2                      | C1                       | 1.16        |  |
|                         | C3                       | 1.30        |  |
|                         | C5                       | 1.20        |  |

O1 1.28  
O2

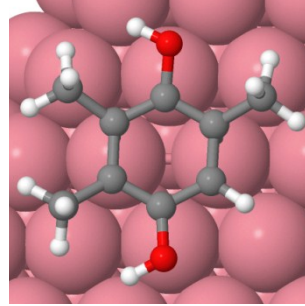

C5 C4 0.92

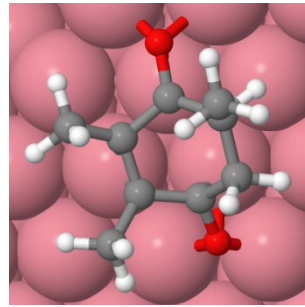

### GC-MS results:

1.

已检索谱库: D:\Database\NIST02.L  
匹配度 : 97  
ID : 1,4-Benzenediol, 2,3,5-trimethyl-

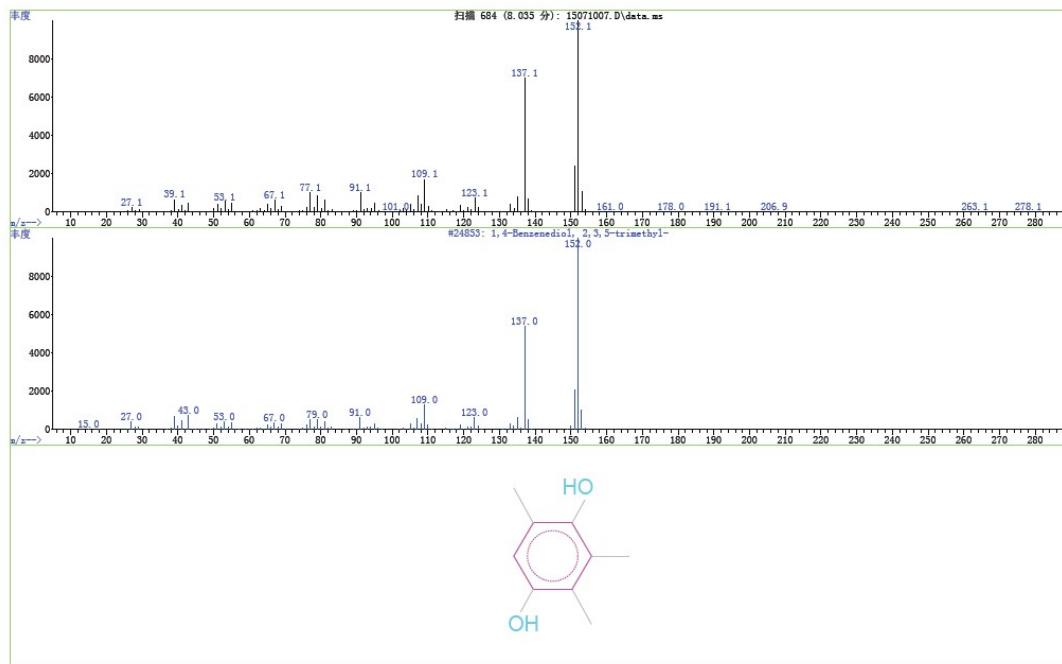

2.

已检索谱库: D:\Database\NIST02.L  
匹配度 : 93  
ID : 2-Butanone, 4-phenyl-

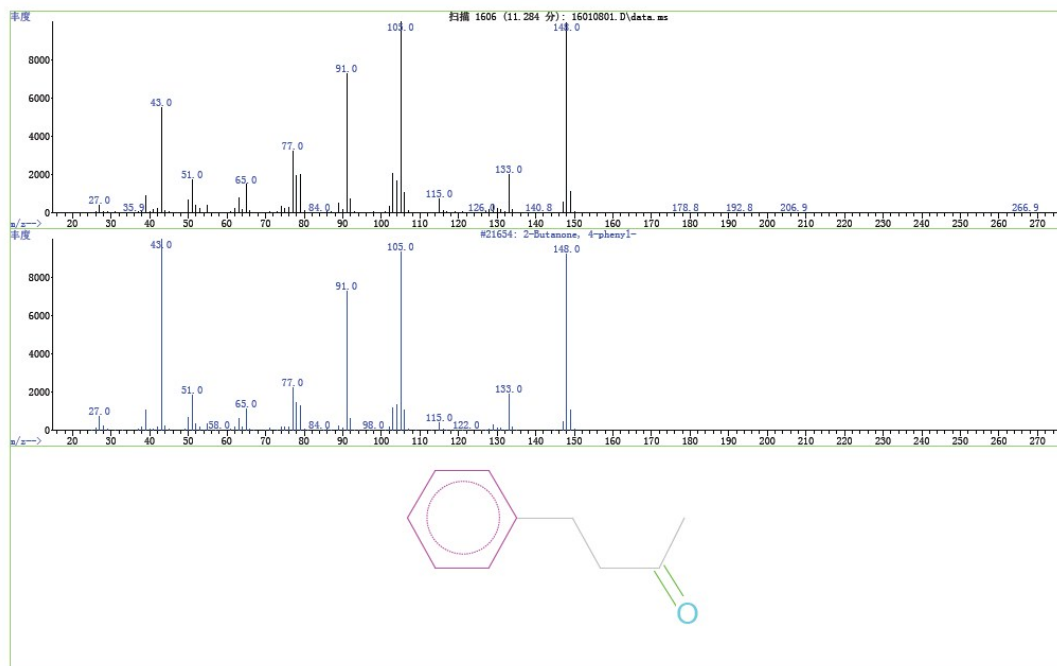

3.

已检索谱库: D:\Database\NIST02.L  
匹配度 : 90  
ID : .beta.-Phenylpropionone

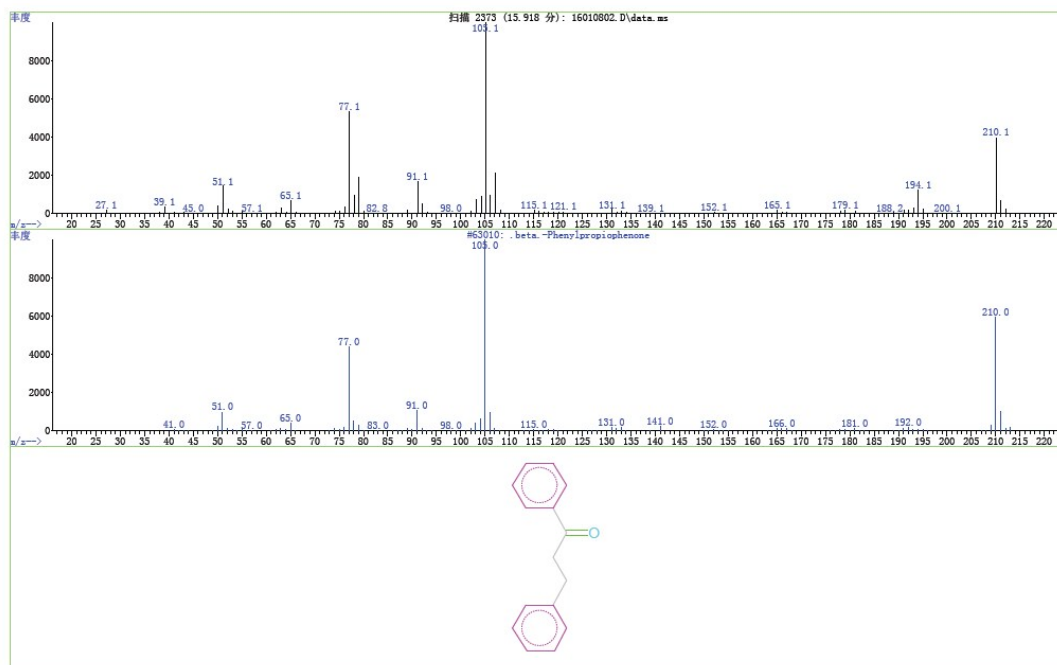

4.

Library Searched : D:\Database\NIST02.L  
Quality : 97  
ID : Benzenepropanoic acid, ethyl ester

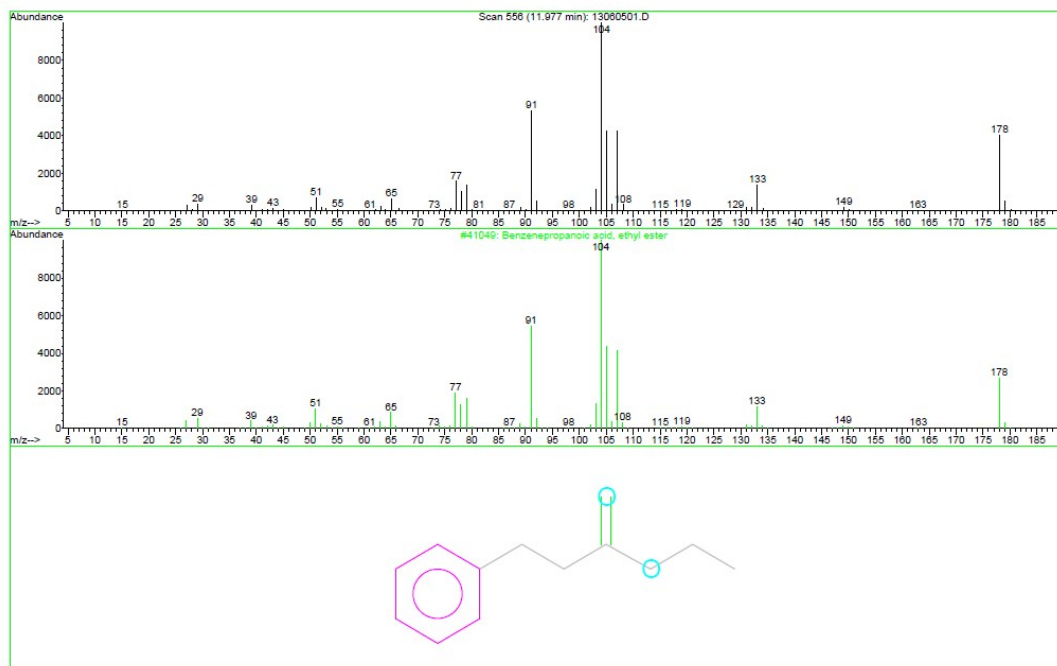

5.

已检索谱库: D:\Database\NIST02.L  
匹配度 : 94  
ID : Butanoic acid, ethyl ester

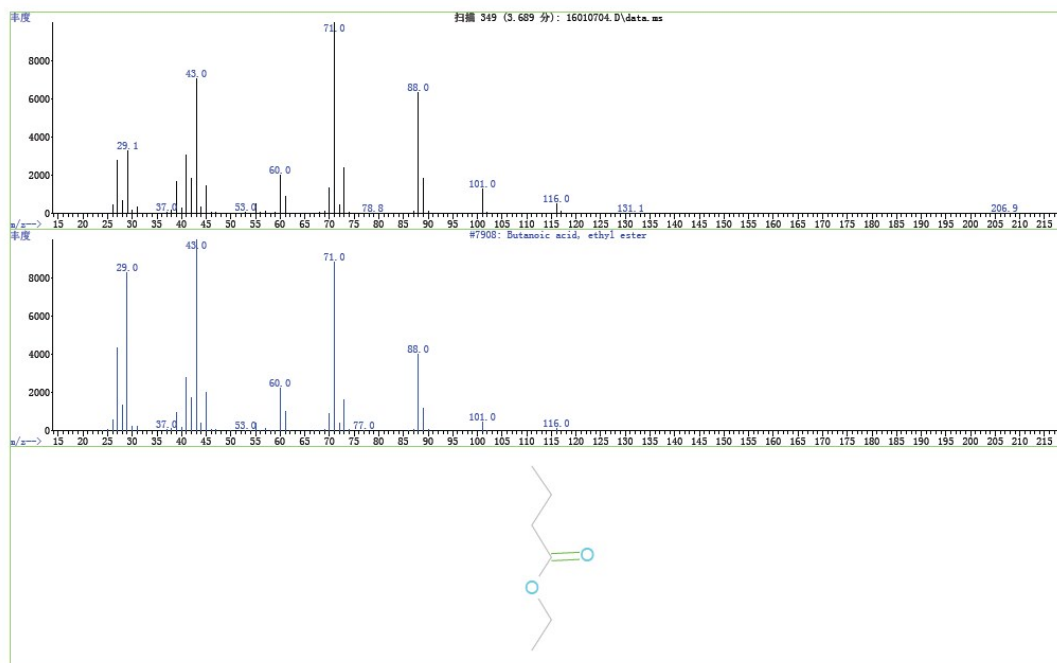

6.

Library Searched : D:\Database\NIST02.L  
Quality : 91  
ID : Benzenepropanenitrile

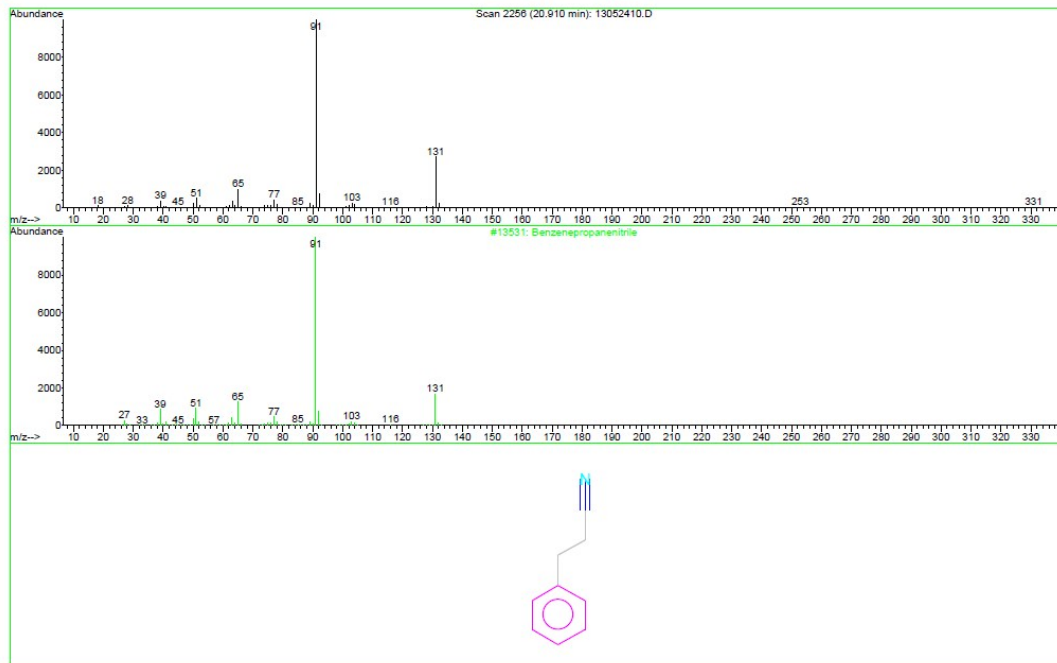

7.

已检索谱库: D:\Database\NIST02.L  
匹配度 : 91  
ID : Propanamide

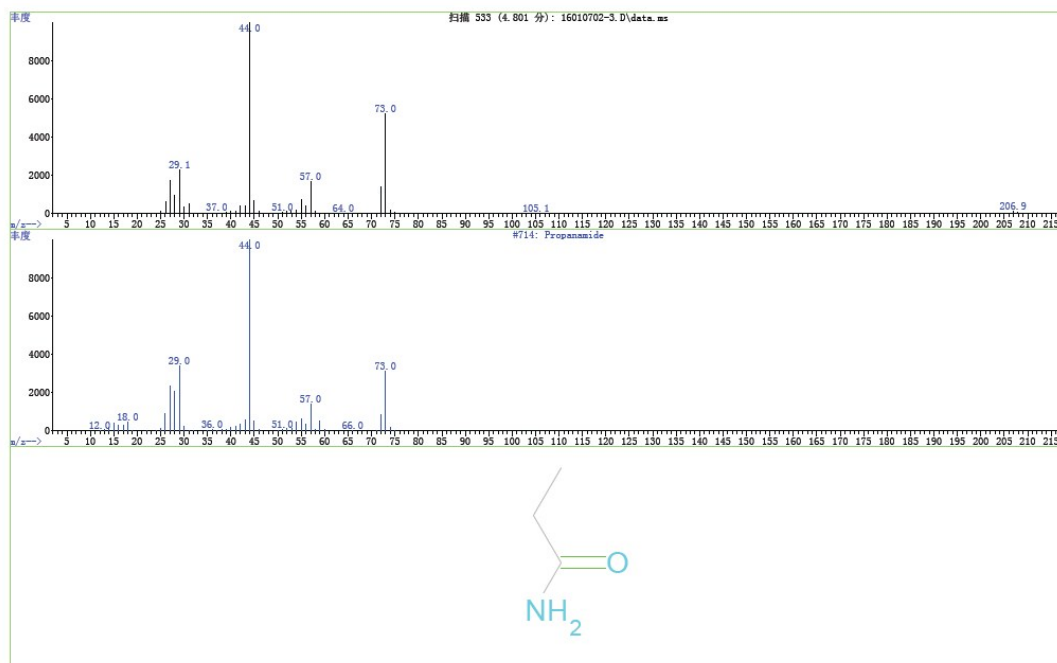

## 8.

已检索谱库: D:\Database\NIST02.L  
匹配度 : 64  
ID : 1,4-Cyclohexanedione, 2,2,6-trimethyl-

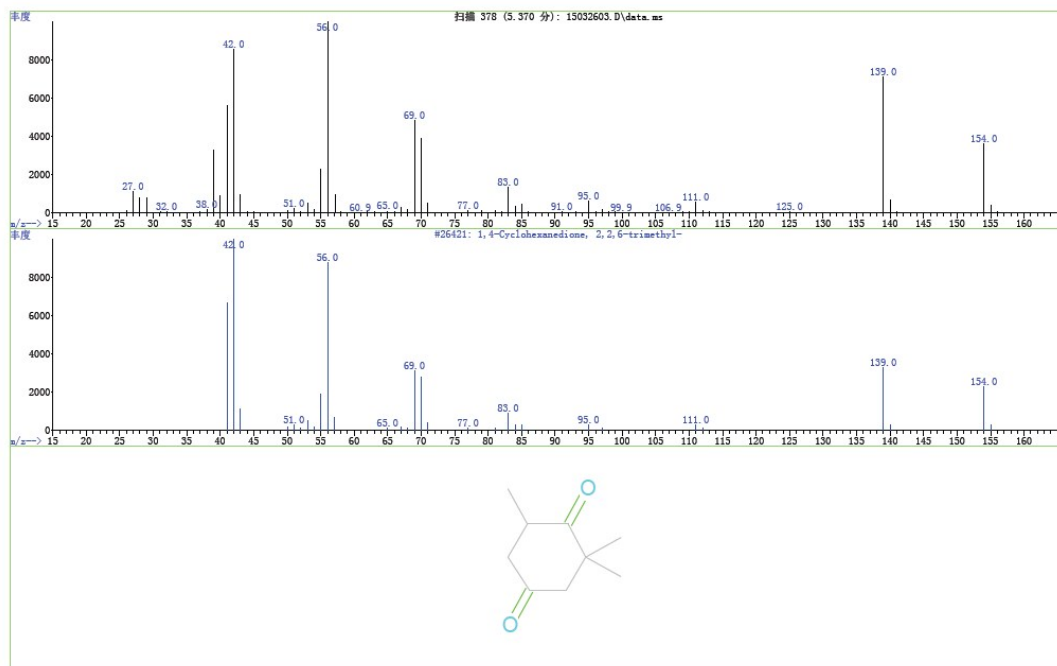

## Reference

- 1 Z. Wei, J. Wang, S. Mao, D. Su, H. Jin, Y. Wang, F. Xu, H. Li and Y. Wang, *ACS Catal.*, 2015, 4783-4789.
